# Supplementary material
Source: PubMed Central journal article supplement (PMC4540608)
Supplement: NIHMS677332-supplement-01.pdf [file NIHMS677332-supplement-01.pdf]

|    | N  | Males v. Females     | Mean age (years) | Mean Age of Onset (years) | Duration of disease at time of surgery (Mean; years) |
|----|----|----------------------|------------------|---------------------------|------------------------------------------------------|
| GR | 12 | 8 males<br>4 females | 58.2 ± 2.5       | 45.4 ± 2.1                | 11.5 ± 0.9                                           |
| PR | 4  | 2 males<br>2 females | 61.5 ± 5.6       | 46.0 ± 5.7                | 14.3 ± 2.5                                           |

*Supplementary Table 2.* Patient demographics – Good responders (GR) v. Poor responders (PR).

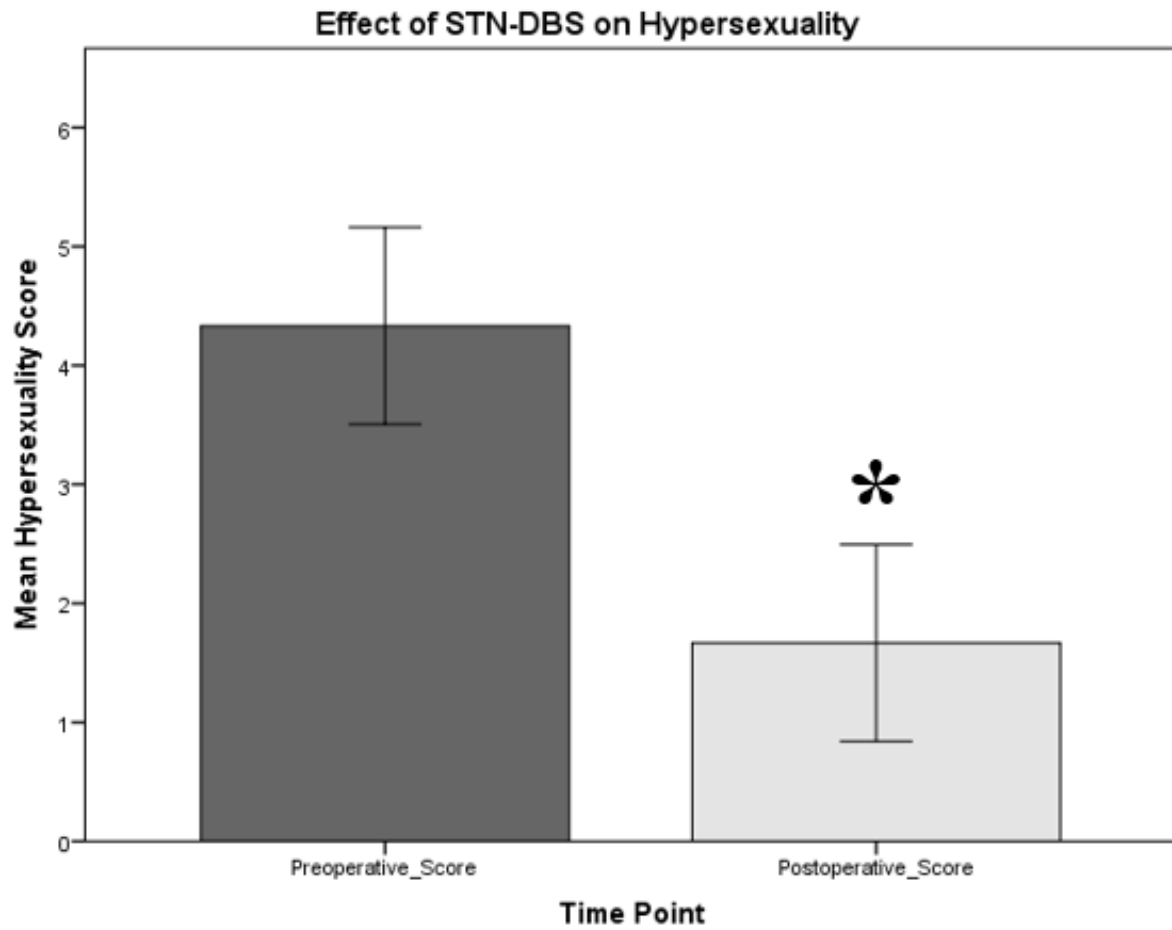

*Supplementary Figure 2a.* Significant decrease in hypersexual behaviors following DBS treatment. (N = 12)

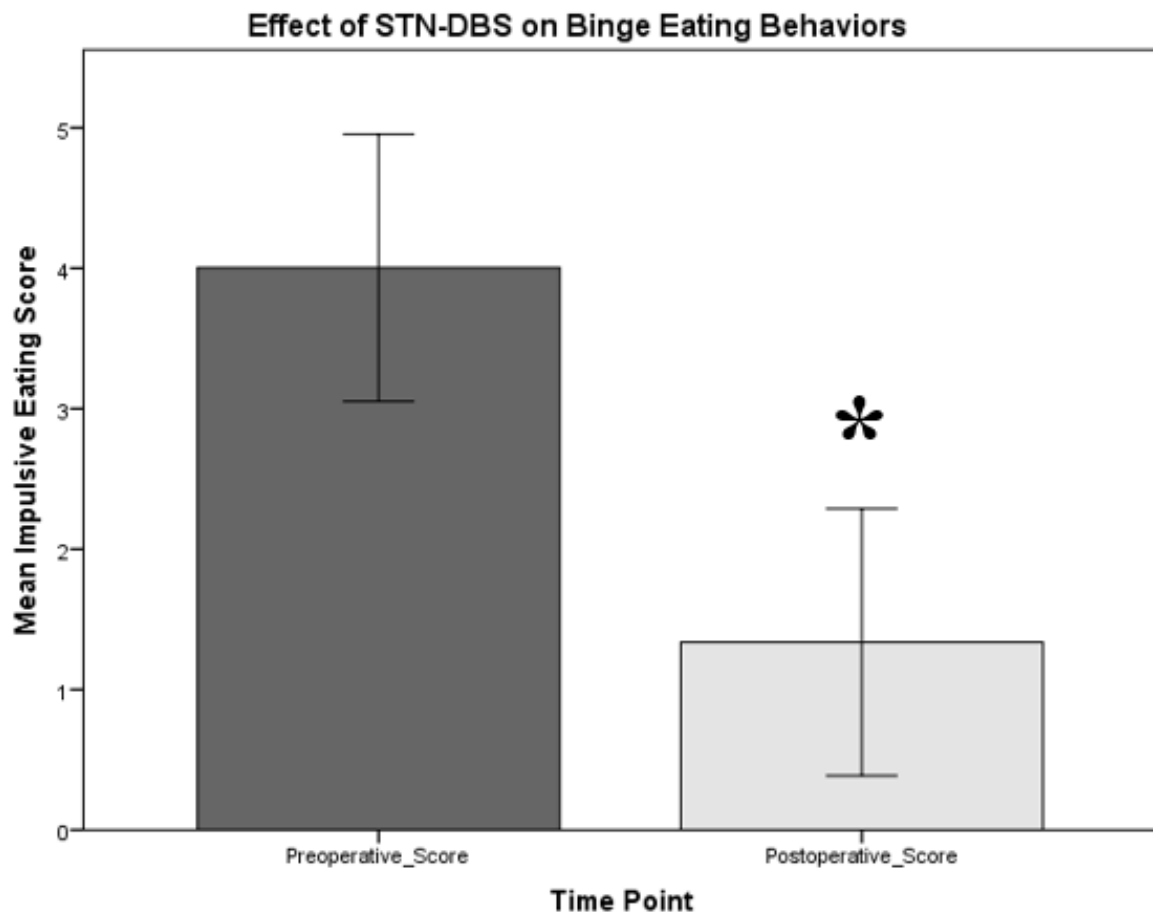

*Supplementary Figure 2b.* Significant decrease in binge eating behaviors following DBS treatment. (N = 12)

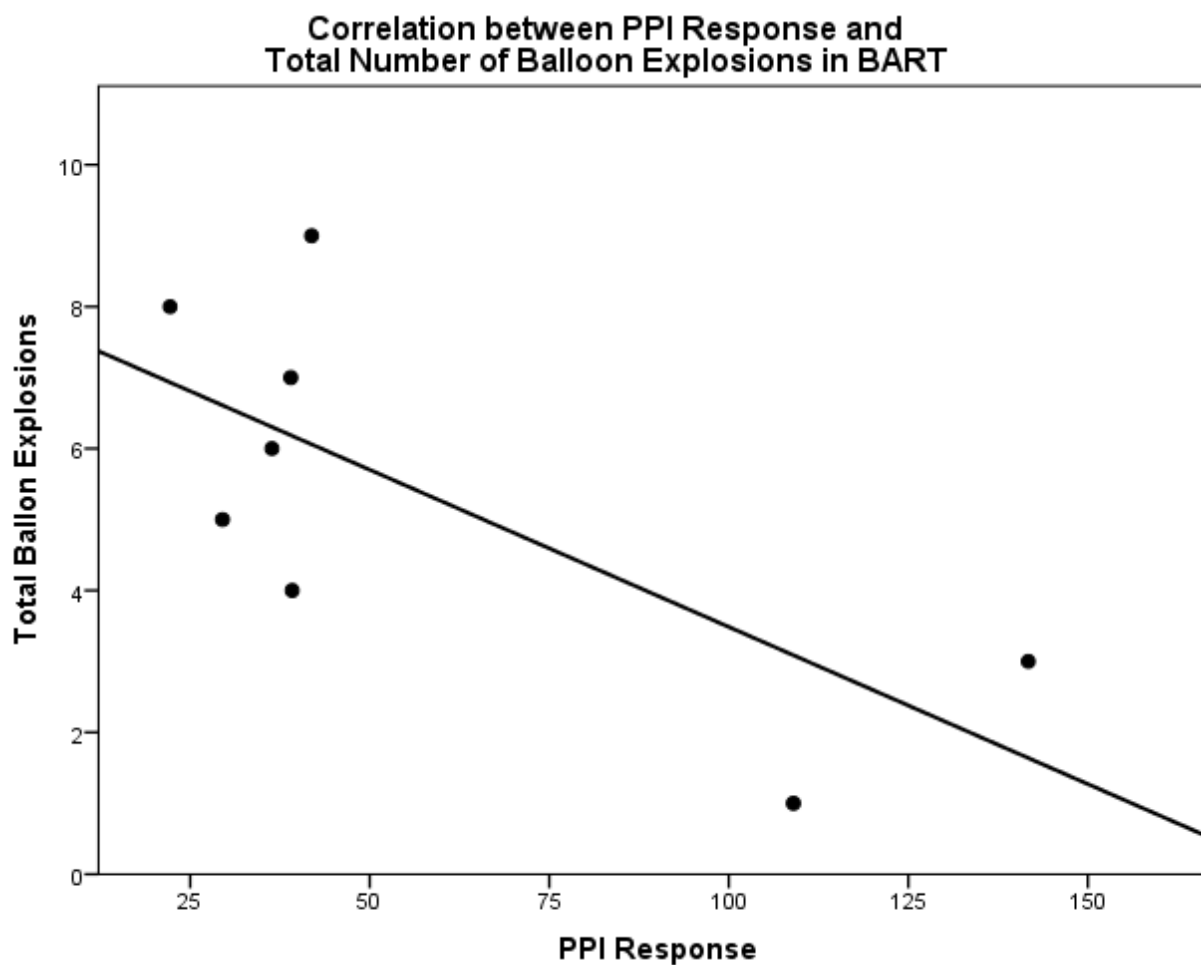

*Supplementary Figure 3a.* Correlation between impaired PPI and total number of balloon explosions in BART – suggesting a relationship between impaired sensory gating and impulsive measures.

( $N = 8$ ;  $r = -0.72$ ,  $p = 0.044$ )

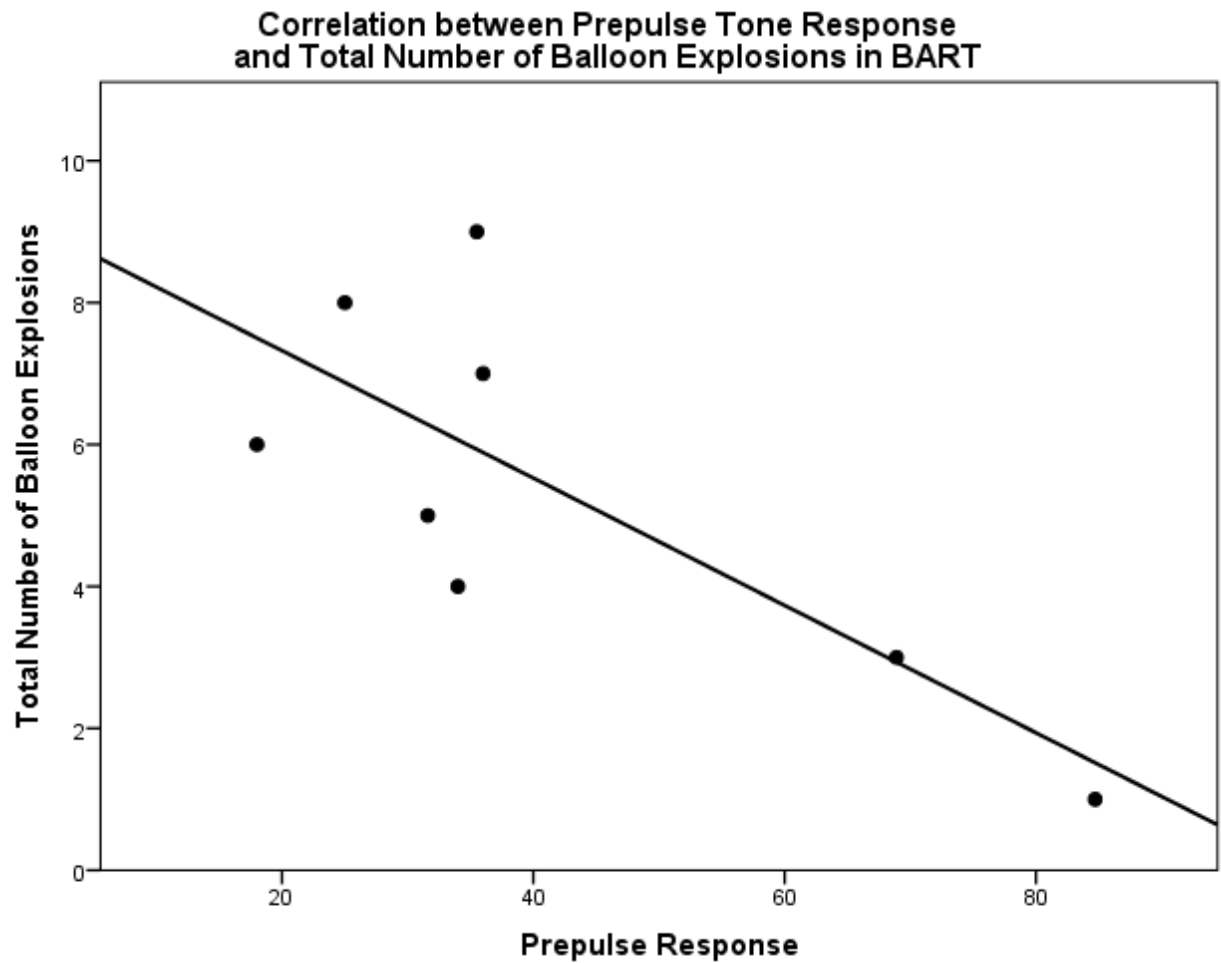

*Supplementary Figure 3b.* Correlation between response to non-startling prepulse tone and total number of balloon explosions in BART – implying a relationship between impaired sensory gating and impulsive measures.  
( $N = 8$ ;  $r = -0.77$ ,  $p = 0.026$ )
